# Supplementary material for: Metabolic features of Gulf War illness
Source: PubMed Central journal article supplement (PMC6660083; doi:10.1371/journal.pone.0219531), 2019-07-26

# Figure S1

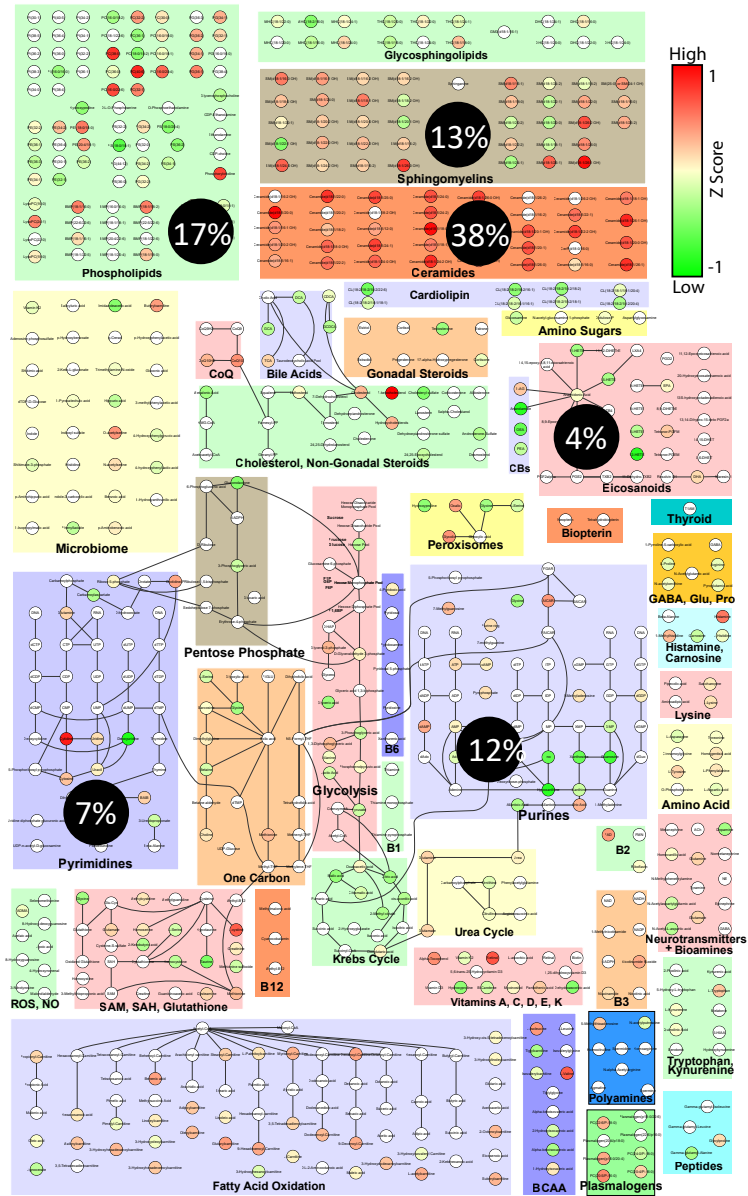

Supplement: pone.0219531.s006.pdf [file pone.0219531.s006.pdf]
