# Supplementary material for: Metabolic features of Gulf War illness
Source: PubMed Central journal article supplement (PMC6660083; doi:10.1371/journal.pone.0219531), 2019-07-26
Supplement: pone.0219531.s007.pdf [file pone.0219531.s007.pdf]

# Figure S2

**A**

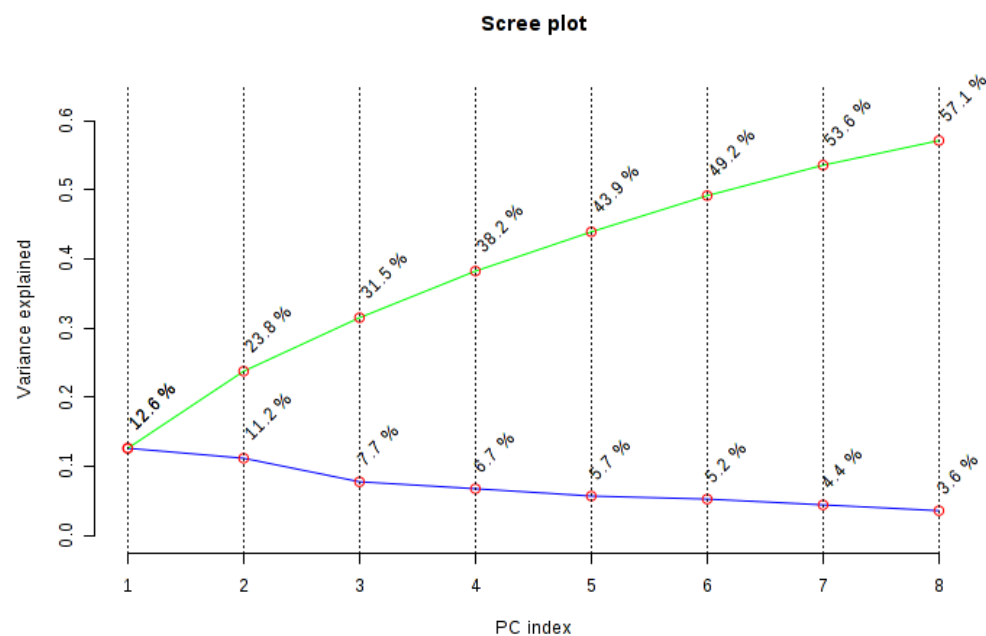

**B**

| No. | PC1 Metabolite                   | PC1 (12.6%) | No. | PC2 Metabolite        | PC2 (11.2%) |
|-----|----------------------------------|-------------|-----|-----------------------|-------------|
| 1   | Ceramide(d18:1/18:0 OH)          | 0.11454     | 1   | L-Homoserine          | 0.11309     |
| 2   | Ceramide(d18:1/20:0 OH)          | 0.1134      | 2   | Pimelylcarnitine      | 0.10365     |
| 3   | Ceramide(d18:1/18:1)             | 0.11268     | 3   | Octadecanoylcarnitine | 0.10112     |
| 4   | Ceramide(d18:1/24:2 OH)          | 0.11231     | 4   | L-Palmitoylcarnitine  | 0.10024     |
| 5   | Ceramide(d18:1/20:1 OH)          | 0.11229     | 5   | Adipoylcarnitine      | 0.096754    |
| 6   | Dehydroisoandrosterone 3-sulfate | -0.055086   | 6   | THC(18:1/18:0)        | -0.1009     |
| 7   | Cortisone                        | -0.056052   | 7   | L-Proline             | -0.10535    |
| 8   | LysoPC(22:0)                     | -0.05668    | 8   | GC(18:1/16:0)         | -0.10621    |
| 9   | Inosine                          | -0.058591   | 9   | THC (18:1/16:0)       | -0.1105     |
| 10  | PC(20:4/P-16:0)                  | -0.058668   | 10  | DHC(18:1/16:0)        | -0.12021    |
